# Supplementary material for: The Association between Prognostic Nutritional Index (PNI) and Intraoperative Transfusion in Patients Undergoing Hepatectomy for Hepatocellular Carcinoma: A Retrospective Cohort Study
Source: MDPI journal article supplement (doi:10.3390/cancers13112508), 2021-05-21
Supplement: s1 [file s1]

**Table S1.** Univariate and multivariable analysis of the risk Factors of postoperative transfusion.

|                                    | Univariate |            |         | Multivariate |           |         |
|------------------------------------|------------|------------|---------|--------------|-----------|---------|
|                                    | OR         | 95% CI     | P-value | OR           | 95% CI    | P-value |
| PNI (< 44)                         | 2.41       | 1.20–4.83  | 0.014   | 1.92         | 0.90–4.10 | 0.089   |
| Age                                | 0.99       | 0.96–1.03  | 0.727   |              |           |         |
| Sex (male)                         | 1.32       | 0.59–2.98  | 0.499   |              |           |         |
| BMI                                | 0.93       | 0.82–1.05  | 0.242   |              |           |         |
| DM                                 | 0.45       | 0.06–3.40  | 0.445   |              |           |         |
| HTN                                | 1.35       | 0.40–4.54  | 0.624   |              |           |         |
| MELD scores                        | 1.37       | 1.09–1.71  | 0.007   | 1.27         | 0.98–1.64 | 0.066   |
| CTP scores                         | 2.15       | 1.23–3.75  | 0.007   |              |           |         |
| TNM staging                        |            |            | 0.070   |              |           |         |
| 1                                  | 1.00(Ref.) |            |         |              |           |         |
| 2                                  | 3.73       | 1.32–10.57 | 0.013   |              |           |         |
| 3                                  | 4.40       | 0.94–20.51 | 0.059   |              |           |         |
| 4                                  | 1.45       | 0.65–3.24  | 0.362   |              |           |         |
| Hemoglobin                         | 0.84       | 0.68–1.03  | 0.100   |              |           |         |
| RDW                                | 1.20       | 1.02–1.42  | 0.030   |              |           |         |
| Operation time; min                | 1.01       | 1.01–1.01  | < 0.001 | 1.01         | 1.01–1.01 | < 0.001 |
| Synthetic colloid use              | 2.38       | 1.12–5.05  | 0.024   | 1.97         | 0.90–4.30 | 0.090   |
| Extensive surgery<br>(≥3 segments) | 1.60       | 0.37–6.92  | 0.529   |              |           |         |
| Laparoscopic surgery               | 0.63       | 0.24–1.65  | 0.347   |              |           |         |

OR, odds ratio; CI, confidence interval; BMI, body mass index; DM, diabetes mellitus; HTN, hypertension; MELD, model for end-stage liver disease; CTP, child-turcotte-pugh; RDW, red cell distribution width; PNI, prognostic nutritional index; SD, standard deviation. Values are expressed as the mean ± SD, median (interquartile range), or n (proportion).
